1 Research article

2

3 TITLE

4 Where does the rainbow end? A case study of self-sustaining rainbow trout *Oncorhynchus mykiss* populations in  
5 tropical rivers

6

7 AUTHOR INFORMATION

8 Marie Nevoux, Amandine D. Marie, Julien Raitif, Jean-Luc Baglinière, Olivier Lorvelec, Jean-Marc Roussel  
9 DECOD (Ecosystem Dynamics and Sustainability), INRAE, Institut Agro, IFREMER, Rennes, France

10

11 Corresponding author:

12 Marie Nevoux

13 marie.nevoux@inrae.fr

14 ORCID: 0000-0003-1451-7732

15

## ABSTRACT

The great physiological, behavioral and morphological plasticity of salmonids contributed to the success of their introduction into a wide range of habitats. However, rainbow trout (*Oncorhynchus mykiss*) is the only salmonid species to live in the tropics. Like for any cold-water species, water temperature is assumed to be a major constraint to the presence and expansion of rainbow trout. In this study, we investigated key drivers of the establishment of self-sustaining populations of rainbow trout in the tropical rivers of Reunion Island (West Indian Ocean). We collected detailed records of the introduction history of rainbow trout at 38 sites across the island over 80 years to determine whether the presence/absence of trout could be related to the introduction effort. Surprisingly, the presence of trout was limited to 10 known sites and seemed independent of the introduction effort. There was no evidence of large-scale expansion of trout away from introduction sites, and the risk of expansion from current self-sustaining populations appeared low. We then quantified how seasonal water temperatures influenced the presence of self-sustaining populations of rainbow trout. As expected, low temperature is a prerequisite for the presence of trout, which is favored at high elevations in this tropical region. We provide evidence that the presence of trout is limited by temperature in summer and winter, which makes it vulnerable to global warming throughout its life cycle. By translating threshold temperatures into elevation, we estimated the probability of the presence of trout, spatially, after introduction along all perennial rivers of the island. Upscaling results from a few study sites to a larger spatial scale is a useful tool for managers in this and other data-poor areas.

## KEYWORDS

Elevation, introduction, presence, salmonid, temperature

## DECLARATIONS

The study was funded in part by the French National Office for Biodiversity (TAC-Reunion project), which funded the salary of AM and JR.

## Conflict of interest

The authors declare no conflict of interest.

## INTRODUCTION

Native to the northern hemisphere, salmonid species have been introduced worldwide (Welcomme 1988; Crawford & Muir 2008; Lecomte *et al.* 2013), especially brown trout (*Salmo trutta*), brook trout (*Salvelinus fontinalis*), coho salmon (*Oncorhynchus kisutch*) and rainbow trout (*Oncorhynchus mykiss*). Their great physiological, behavioral and morphological plasticity contributes to the success of their introduction into a wide range of environmental conditions (Sauter *et al.* 2001). Since they are a cold-water species, however, successful introductions have been reported mainly at high latitudes and in temperate regions (Cowx 1997; Stanković *et al.* 2015; Koutsikos *et al.* 2019), since water temperature is a major constraint to their ontogeny and expansion. Among salmonids, rainbow trout has the widest latitudinal distribution in its native range (Fig. 1a), from 23-64°N (MacCrimmon 1971; Welcomme 1988; Crawford & Muir 2008). The population in the Sierra Madre Occidental Mountains of Mexico represents the southernmost native range of any salmonid (Behnke 2010), along with the Formosan landlocked salmon (*Oncorhynchus masou formosanus*) in Asia. These populations reflect rainbow trout's ability to survive under extreme thermal conditions (MacCrimmon 1971; Gall & Crandell 1992). Its optimal range is 10-16°C, but adults can endure peaks of 25°C (Raleigh 1984; Jalabert & Fostier 2010) and even up to 28-30°C (Matthews & Berg 1997; Sloat & Osterback 2013). In contrast, it reproduces in winter to meet requirements for lower temperatures. Spawning and successful egg development have been recorded at temperatures of 4-13°C (Morrison & Smith 1986; Pankhurst *et al.* 1996; Jalabert & Fostier 2010) and even up to 15.5°C (Scott & Crossman 1973). Above 20°C, however, the fecundity rate and embryonic survival decrease greatly (King *et al.* 2003).

Since the middle of the 20<sup>th</sup> century, rainbow trout has been massively introduced worldwide for aquaculture and recreational purposes (Welcomme 1988). According to the FAO (2003), at least 97 countries have introduced it (Fig. 1a), including 38 in the tropics (Table S1). To our knowledge, rainbow trout is the only salmonid species that lives in the tropics. Lethal temperature is the main reason that introductions have failed in Puerto Rico, the Philippines, Trinidad and Mauritius (MacCrimmon 1971). Nevertheless, the existence of self-sustaining populations (i.e. recruitment unsupported by and independent of continued human interactions, *sensu* Copp *et al.* (2005)) has been reported in nearly 70% of tropical countries where the species was introduced (Fig. 1b, Table S1). Tropical populations of rainbow trout are presumably found at high elevations, where the ambient temperature is cool (Therezien 1960; Péfaur & Sierra 1998; Ngugi & Green 2007; Vila *et al.* 2007; Kadye *et al.* 2013; Vimos *et al.* 2015), such as in the Nyanga Mountains (>1,800 m) in Zimbabwe or Lake Titicaca (3,812 m) in Peru and Bolivia. However, the dual influence of water temperature and elevation on the success of introduced rainbow

trout in the tropics has not been clearly determined. In the current context of global warming, understanding how rainbow trout populations respond to high temperatures in tropical regions may help better predict the future of salmonids in their native ranges.

The objective of this study was to investigate how summer and winter water temperatures influence the presence of self-sustaining populations of rainbow trout in tropical regions. After reviewing the literature on tropical populations of the species, we focused on the unique case study of Reunion Island (West Indian Ocean), where rainbow trout has been repeatedly introduced since 1940, with varying success. A dense network of rivers that flow from high-elevation volcanic mountains provides a large gradient of water temperatures. Since early life stages of salmonid species are particularly sensitive to high temperatures (Sullivan *et al.* 2000; Benjamin *et al.* 2013), we explored the influence of winter temperatures as the main driver of successful population establishment after introduction, as well as the possible limiting effect of high summer temperatures. Warming summer temperatures are identified as a main threat for the viability of rainbow trout populations in its native range in the northwestern United States (Sloat & Osterback 2013; Brewitt & Danner 2014). In the tropics, where summer temperatures are already high, warming winters could reach a critical level that is incompatible with trout reproduction and thus become relatively more limiting than in a temperate climate. Our objectives were threefold. We first reviewed and collected the stocking history of rainbow trout on Reunion Island to determine whether the introduction effort influenced the presence/absence of trout. We then used river-specific water temperature records to model the influence of mean monthly temperatures during winter and summer on the successful establishment of rainbow trout populations. Finally, we predicted the probability of the presence of rainbow trout as a function of elevation to provide guidelines for managing rainbow trout populations in the multiple and contrasting landscapes on Reunion Island.

## MATERIALS & METHODS

### *Study site*

Reunion Island is a 2,512 km<sup>2</sup> French overseas department located in the Indian Ocean (21.2°S, 55.6°E). The highest peak of this volcanic island reaches 3,069 m above sea level. Its hydrology is characterized by heavy rain during the cyclone season (December to April). The topography and aquifers generate high spatial and temporal heterogeneity in the quantity of water in rivers (Robert 1985). The island is drained by 13 perennial rivers and 43

transient watersheds characterized by their high degree of natural habitat fragmentation and their torrentiality, which can reach up to 30,000 l/s/km<sup>2</sup> on a few km<sup>2</sup> of watershed (Robert 1985). Anthropogenic barriers, which are less common than natural fragmentation, are restricted mainly to lowland areas.

The rivers of Reunion Island host 26 fish and 11 decapod crustacean species, of which 20 and 10, respectively, are indigenous catadromous species (Keith 2002). Of the seven species that were introduced to the island, only four established self-sustaining populations: tilapia (*Oreochromis niloticus*), guppy (*Poecilia reticulata*), swordtail (*Xiphophorus hellerii*) and the non-anadromous form of rainbow trout (Keith 2002). The presence of juvenile rainbow trout in the absence of introduction, which indicates wild reproduction, is the criterion used to define a self-sustaining population. The presence of self-sustaining rainbow trout populations is assessed by visual observation (e.g. presence of juveniles, acts of spawning, redds) and electrofishing surveys conducted by the local association for fishing and the protection of aquatic environments (hereafter, fishing association). The presence or absence of a self-sustaining population from 2016-2020 was assessed at each site where trout had been introduced, all sites where its presence was suspected, and at all sites where temperature data were available (see below). A site, the smallest spatial unit considered, was defined as a stretch of river a few hundred m long with homogeneous habitat that is usually delineated by natural discontinuities (waterfalls). We assumed that each site's characteristics and dynamics did not change over the five years of the study. Each site was described by a unique identification number, the river and local name, elevation (Table S2) and geographic coordinates (Fig. S3).

### *Introduction history of rainbow trout*

The rainbow trout introduced to Reunion Island have come from Madagascar (Robert, 1975), with the initial objective to provide a new source of food for the French colony (Robert, 1978). To understand how introduction effort influences the presence of trout, we reviewed the available reports to update the history of trout stocking on Reunion Island. The main sources of information were publications by R. Robert (Robert 1975, 1976, 1977, 1978) and reports by the National Forest Office and the fishing association. Despite our efforts to identify all introduction events from 1940-2019, some information from 1940-1950 and 1978-1990 may have been missing due to the loss of archival records. Details about the number of introduction events, the number of trout introduced, the period of introduction and the organization in charge of the introduction were collected (Table S2).

# *Temperature data*

We investigated the influence of water temperature on the presence of self-sustaining rainbow trout populations on Reunion Island for 33 study sites spread across a wide range of elevations (5-1,470 m). At each site, water temperature was recorded daily from 2010-2021 by autonomous data loggers or fixed meteorological stations (Table S2). The local water agency (<http://www.naiades.eaufrance.fr>) and the fishing association provided the water temperature data. Mean monthly temperature at 12 p.m. was used as an explanatory variable in the analysis.

# *Identifying drivers of the presence of trout*

We modeled the probability of trout establishing a self-sustaining population as a function of the introduction history. The presence or absence of a self-sustaining population at the time of the study (2016-2020) at each site where trout had been introduced was used as the response variable in a generalized linear model (GLM) with a binomial distribution of errors (Bolker *et al.* 2009). We hypothesized that self-sustaining populations were positively related to the number of introduction events and the number of trout introduced. For some events, reports only tracked the total weight of trout introduced. In the absence of information on the size or weight of trout, we were not able to assess the number of trout considered, thus the recorded number of trout introduced is an underestimation of the introduction effort. We hypothesized that self-sustaining populations were negatively related to the number of years since the last introduction, since the probability that extreme environmental conditions (e.g. cyclonic floods) could extirpate the population increases over time. In addition, the organizations in charge of introductions used trout broodstock from multiple strains and fish farms. Since genetic characteristics and rearing conditions may influence the adaptive capacity of trout introduced into the wild (Araki *et al.* 2008), we included the organization in charge of the introduction as an explanatory factor in the GLM. The effects were selected based on Akaike's information criterion (AIC, Burnham *et al.* 2011). As a measure of how well the model fit the data, we used the deviance-based pseudo- $R^2$ , calculated as (null deviance–residual deviance)/null deviance.

Similarly, we modeled the probability of the presence of trout as a function of mean monthly water temperature and season (the explanatory variables), using a GLM with a binomial distribution of errors. Season was a two-level factor that distinguished the winter “spawning” season (May to September) from the summer “growing” season (October to April). We tested for both additive and interaction effects of temperature and season. Effects were selected based on AIC, and model fit was assessed using the pseudo- $R^2$ . The model with the lowest AIC was selected (hereafter Mtemp).

161

## 162 *Relating temperature to elevation*

163 Autonomous temperature loggers provided detailed measurements of water temperature at the study sites.  
 164 However, temporal and spatial coverage was often limited by the loss of loggers due to cyclones or vandalism, by  
 165 the cost of the devices or by the logistical difficulties involved in deploying scientific equipment in a remote area.  
 166 Thus, our results needed to be upscaled from a few study sites to a large area that is more relevant for conservation.  
 167 Since temperature depends on elevation, we built a simple GLM to predict the probability of the presence of  
 168 rainbow trout in all perennial rivers on Reunion Island as a function of elevation. We first explored the linear  
 169 relationship between mean monthly water temperature and season/elevation using a GLM with a normal  
 170 distribution of errors. The model was based on temperature and elevation data from all 33 sites (Table S2). From  
 171 this model, we estimated mean summer and winter water temperatures for 2297 locations along all of the perennial  
 172 rivers. The elevation of each location was extracted from a detailed topographic map provided by the French digital  
 173 elevation model (BD ALTI, 25 m resolution, <https://geoservices.ign.fr/bdalti>). We then calculated and mapped the  
 174 predicted probability of the presence of rainbow trout at all locations, based on its seasonal temperature preferences  
 175 as described in the Mtemp model. All analyses were performed using R v4.0.5 (R Development Core Team 2018).  
 176 Maps were produced using QGis version 2.8.93.10 (<https://www.qgis.org/en/site/>).

177

## 178 RESULTS

### 179 *Introduction history of rainbow trout*

180 We found evidence that rainbow trout were introduced into 7 rivers (i.e. Mât, Roches, Marsouins, Galets,  
 181 Langevin, Remparts and St-Etienne) out of the 13 perennial rivers on Reunion Island (Fig. 2). Historical records  
 182 documented that 422,905 individuals and an additional 860 kg of rainbow trout were released at 38 sites in these  
 183 rivers or their tributaries from 1940-2019 (Table S2). The introduction effort varied greatly among sites (Fig. 2),  
 184 with a single introduction of 200 trout in 2007 at site 44, but 72,325 trout introduced over more than 30 events at  
 185 site 29. The presence of a self-sustaining population of trout was recorded at 9 sites of the 33 introduction sites  
 186 whose location was specified (Table S2). We found only one site with a self-sustaining population of trout where  
 187 no introduction had been documented (site 18). Nevertheless, we observed that trout had been introduced ca. 500  
 188 m upstream of this site, at sites 21 and 42. The mean probability of observing a self-sustaining population of trout  
 189 at one of the 33 sites where trout had been introduced was 0.24 (standard error = 0.075). None of the variables

tested improved the fit of the constant model, which indicated that trout presence was independent of the introduction effort (Table 1).

### *Seasonal water temperature profiles*

Mean monthly water temperatures at the study sites ranged greatly, from 11.0-22.1°C in winter and 14.6-27.7°C in summer (Fig. 3). Seasonality, which can be described by a decrease in temperature in winter, was distinct at some sites, while temperature profiles remained flat throughout the year at several other sites. Self-sustaining populations of trout were present at sites with low water temperature and high seasonal variability, but some sites with low water temperature had no trout, despite trout introduction. At sites where trout were present, mean temperature in summer and winter were 17.5°C (standard deviation (SD) = 0.8) and 14.9°C (SD = 1.0), respectively. The warmest month on record at a site with trout reached a mean temperature of 19.6°C (SD = 1.04) (site 42 in March 2020).

### *Water temperatures and the probability of the presence of trout*

As expected, the presence of self-sustaining populations of rainbow trout depended greatly on water temperature. However, it also depended on the season, since temperature requirements may vary over the trout life cycle (Table 2). Notably, rainbow trout tolerated higher temperatures in summer than in winter (Fig. 4). The selection of an interaction between temperature and season in the best Mtemp model (Table 2) indicated that trout responded more strongly to an increase in temperature in summer than in winter. The Mtemp model predicted that the probability of the presence of a self-sustaining trout population is less than 0.05 when the mean monthly water temperature exceeds 20.1°C in winter and 20.5°C in summer (Fig. 4). This probability increases to 0.50 when mean water temperature is less than 15.6°C in winter and 18.4°C in summer, and reaches 0.95 when it is less than 11.0°C in winter and 16.4°C in summer.

### *Contrasting summer and winter water temperatures across sites*

The mean monthly water temperatures in summer and winter differed greatly among study sites (Fig. 5) and often exceeded those compatible with a 0.05-0.95 probability of presence of self-sustaining trout populations. At some sites, water temperatures fell within the 0.05-0.95 probability of presence of trout in one season (winter at site 14),



but not the other season, which compromises the persistence of trout in the wild. At sites 11 and 13, both winter and summer water temperatures were higher than the threshold temperatures needed for a 0.50 probability of presence, which indicated that the presence of trout remained uncertain. However, no trout were observed at these sites. At site 21, winter water temperatures were compatible with a probability of presence greater than 0.50, but summer water temperatures appeared limiting, as confirmed by the absence of trout at this site. At site 20, we observed no evidence that temperatures would limit the presence of trout, although trout were absent.

#### *Using elevation as a proxy of temperature to predict the probability of the presence of trout*

Mean monthly water temperature correlated strongly with both elevation and season (Table 3), which explained as much as 76.6% of the variance in the data. Adding the interaction between elevation and season did not improve the fit of the model, which indicated that the mean decrease in water temperature for each m in elevation was similar in winter and summer (Table 3, Fig. 6). However, due to the interaction between temperature and season in the Mtemp model (Table 2), the season that limits the presence of trout may differ among sites with different elevations (Fig. 6). When considering threshold temperatures for a given probability of the presence of trout, the maximum suitable temperature for summer and winter were not reached at the same elevation. For instance, the threshold temperature for a 0.50 probability of presence of trout in winter and summer was predicted to occur at 852 and 872 m, respectively. In this case, mean summer water temperatures were slightly more restrictive for the presence of trout at a given elevation. In lowlands, high temperatures strongly limited the presence of self-sustaining populations, but in highlands, temperatures were more suitable for trout, with a predicted 0.95 probability of presence at 1,782 m and higher. However, the increasing gap between summer and winter requirements with increasing elevation (Fig. 4) indicated that winter was the main driver of trout self-sustainability. To illustrate these results, we developed a map that summarizes the estimated probability of the presence of trout after introduction as a function of elevation for the entire island (Fig. 7).

## DISCUSSION

Rainbow trout is a stenotherm species that is native to temperate rivers of North America. It has been extensively introduced all over the world and the literature review indicates that tropical regions are no exception (Fig. 1 and S1). Despite the recognized plasticity of trout, its long-term persistence in the tropics seems challenging due to its affinity for cold water. On Reunion Island, the introduction of trout into at least 38 different sites in river stretches across the country illustrates a long-term and widely spread introduction effort across high-elevation perennial

rivers. Despite the recorded release of > 400,000 rainbow trout, we are aware of only 10 self-sustaining populations. Interestingly, introduction effort had no influence on the presence of self-sustaining populations of trout (2016-2020). Similarly, a review of rainbow trout introduction into the wild in Europe (Stanković *et al.* 2015) reported that self-sustaining populations are rare and unevenly distributed despite its intensive 120-year-long history. This result challenges the relevance and objective of current management practices. Indeed, recent management of trout fishing can be described as ‘put and take’, with no clear attempt to establish new populations. The fishing association introduces trout at sites chosen for their fishing attributes (e.g. accessibility, scenery), which could be sub-optimal for trout development. The environmental conditions that fish encounter at release sites, however, appear to have a distinct influence on the success of introduction.

We found no clear evidence of the presence of self-sustaining populations outside sites where trout had been introduced, except for site 18 (Fig. 2), whose immigrants likely originated from the nearby sites 21 and 42, located less than 500 m away. If trout disperse, they likely do so over very short distances. Several environmental factors can hinder trout expansion across rivers on Reunion Island. First, the island’s topography, with steep mountains and many natural waterfalls that result in a high level of habitat fragmentation, strongly limits rainbow trout dispersal from introduction sites. Temporary drying of river stretches due to the highly permeable substrate also limits dispersal. We do not know when the populations established, but based on the long history of introduction (> 80 years), it is likely that some populations have sustained themselves for more than one decade. It is also possible that self-sustaining populations went extinct and re-established themselves at different times in recent history, since trout were introduced into rivers regardless of whether or not they were already present. Nevertheless, there is no evidence for a large expansion of trout from introduction sites, and the risk of expansion from current self-sustaining populations seems low.

The observation of only 10 sites with self-sustaining populations, along with the absence of expansion from these sites, suggest that the environmental conditions that trout encounter after introduction or while dispersing may not meet their ecological requirements well. We specifically focused on water temperature as a key factor that limits the presence of trout in perennial rivers of Reunion Island, since rainbow trout are sensitive to temperature (Fausch 2007). These tropical rivers have a wide range of water temperatures, with higher variability among sites (spatial variability) than within sites (seasonal variability). As expected, the warmest sites had no trout, while the coldest sites did have them. On Reunion Island, trout experience a mean monthly temperature of 17.5°C in summer, with

a maximum of 19.6°C. However, this study highlights a strong response to mean monthly temperature in summer (stronger than that in winter), with the estimated probability of the presence of trout decreasing from 0.95 to 0.05 as temperature increases from 16.4°C to 20.5°C, respectively.

This range differs from the optimal temperature range for rainbow trout defined in the literature (i.e. 10-16°C (Raleigh 1984; Jalabert & Fostier 2010)) but lies below the extreme of 30°C recorded in some pools in southern California, United States (Sloat & Osterback 2013). Some of the coldest sites, however, had no trout despite many introduction events. Although the probability of the presence of trout generally increased as mean monthly temperature decreased, its response differed between summer and winter, both in strength (slope) and magnitude (intercept). This result supports the hypothesis that trout temperature requirements differ between the spawning season (winter) and the growing season (summer). In the trout's native range, increasing summer temperature is a main concern for its persistence under ongoing climate change. It is predicted that higher summer temperatures will decrease the area of thermally suitable riverine trout habitats and cause them to shift upstream (Ruesch *et al.* 2012; Carlson *et al.* 2017; Isaak *et al.* 2018). In contrast, winter temperature requirements are nearly always met in temperate regions (Sloat & Osterback 2013; Brewitt & Danner 2014). On Reunion Island, the highly fragmented habitat prevents trout from dispersing upstream, or even migrating seasonally to colder and more suitable habitats. We show that in the tropics, trout may establish self-sustaining populations only at sites that have cold temperatures in both summer and winter. This result agrees with those of Scott and Poynter (1991), who concluded that high winter temperatures, rather than high summer temperatures, influenced the northern limit of trout distribution in New Zealand.

High summer temperatures may be responsible for the inability of trout to establish themselves at sites where they were introduced, since these temperatures approach the physiological limits of trout. In winter, trout require temperatures no higher than 13°C for several months for successful reproduction (Morrison & Smith 1986; Pankhurst *et al.* 1996; Jalabert & Fostier 2010), which makes winter a critical period of the life cycle. However, prolonged cold temperatures rarely occur on Reunion Island (8 out of 843 mean monthly temperatures <13°C). The relative rate of increase in summer and winter temperatures will be critical in determining the persistence and extinction risk of trout populations. This has implications for improving understanding of responses of rainbow trout to climate change in its native range. In the future, winter temperatures could become a limiting factor for trout reproduction.

308

309 Although detailed water temperature data are rare, the presence of trout populations at high elevations in the  
 310 tropics, where water temperatures are usually cooler, was no surprise. Using elevation as a coarse descriptor of  
 311 trout thermal habitat, we extrapolated the results obtained from a few sites to map the probability of trout presence  
 312 in a larger region. Interestingly, the thresholds of summer and winter temperatures for a given probability of the  
 313 presence of trout (e.g. 0.05, 0.50, and 0.95) occurred at different elevations. Based on our simple temperature-  
 314 elevation model, trout seem able to establish self-sustaining populations (0.95 probability of presence) in perennial  
 315 water at 1,400 m and higher on Reunion Island. However, this is based only on the minimum temperature  
 316 requirements for trout, and other key requirements that limit the presence of trout need to be considered, such as  
 317 natural conditions (e.g. extreme flow regime, spawning habitat, food resources, thermal refuge) and human  
 318 forcing (e.g. pollution, poaching). Furthermore, although the model described a mean variance of 77% in the data,  
 319 highly contrasting geologic and topographic features can generate large differences between watersheds. For  
 320 instance, the Cilaos region of Reunion Island has warmer water due to the presence of geothermal groundwater  
 321 (sites 23, 36 and 37); thus, it may not be suitable for trout, despite its higher elevation. In contrast, upwelling of  
 322 cool groundwater in the United States can form thermal refuges that may become critical habitat that allows trout  
 323 to persist at higher temperatures (Ebersole *et al.* 2001; Sloat & Osterback 2013; Brewitt & Danner 2014). The  
 324 mapping in the present study provides a broad overview of the potential presence of self-sustaining trout  
 325 populations after introduction at a large scale, which we hope will be of interest to managers and policy makers.  
 326 This approach of upscaling knowledge to large data-poor areas is a major challenge in ecology. It could be  
 327 extended to other tropical areas to improve understanding of rainbow trout distribution and ecological regulation  
 328 under warm environmental conditions. We recommend two main directions for future research: i) refine or adapt  
 329 the temperature-elevation model and ii) investigate the interaction between temperature and other limiting factors  
 330 to determine the ability of trout to develop self-sustaining populations in tropical rivers.

331

## 332 ACKNOWLEDGMENTS

333 We are grateful to A. Métro, G. Vienne, J. Maillot, D. Vitry, G. Hoarau and all those who were involved in  
 334 collecting the data used in this study (FDAAPPMA of Reunion Island, its associated AAPPMA and the water  
 335 Agency of Reunion Island). The study was funded in part by the French National Office for Biodiversity (TAC-  
 336 Reunion project), which funded the salary of AM and JR.

337

## REFERENCES

- Araki H, Berejikian BA, Ford MJ, Blouin MS (2008) Fitness of hatchery-reared salmonids in the wild. *Evolutionary Applications*, **1**, 342–355.
- Behnke R (2010) *Trout and Salmon of North America*. Simon and Schuster.
- Benjamin JR, Connolly PJ, Romine JG, Perry RW (2013) Potential effects of changes in temperature and food resources on life history trajectories of juvenile *Oncorhynchus mykiss*. *Transactions of the American Fisheries Society*, **142**, 208–220.
- Bolker BM, Brooks ME, Clark CJ, Geange SW, Poulsen JR, Stevens MHH, White J-SS (2009) Generalized linear mixed models: a practical guide for ecology and evolution. *Trends in Ecology & Evolution*, **24**, 127–135.
- Brewitt KS, Danner EM (2014) Spatio-temporal temperature variation influences juvenile steelhead (*Oncorhynchus mykiss*) use of thermal refuges. *Ecosphere*, **5**, 1–26.
- Burnham KP, Anderson DR, Huyvaert KP (2011) AIC model selection and multimodel inference in behavioral ecology: some background, observations, and comparisons. *Behavioral Ecology and Sociobiology*, **65**, 23–35. <https://doi.org/10.1007/s00265-010-1029-6>
- Carlson AK, Taylor WW, Schlee KM, Zorn TG, Infante DM (2017) Projected impacts of climate change on stream salmonids with implications for resilience-based management. *Ecology of Freshwater Fish*, **26**, 190–204.
- Copp GH, Bianco PG, Bogutskaya NG, Er\Hos T, Falka I, Ferreira MT, Fox MG, Freyhof J, Gozlan RE, Grabowska J (2005) To be, or not to be, a non-native freshwater fish? *Journal of Applied Ichthyology*, **21**, 242–262.
- Cowx IG (1997) Introduction of fish species into European fresh waters: economic successes or ecological disasters? *Bulletin Francais de la Peche et de la Pisciculture (France)*.
- Crawford SS, Muir AM (2008) Global introductions of salmon and trout in the genus *Oncorhynchus*: 1870–2007. *Reviews in Fish Biology and Fisheries*, **18**, 313–344.
- Ebersole JL, Liss WJ, Frissell CA (2001) Relationship between stream temperature, thermal refugia and rainbow trout *Oncorhynchus mykiss* abundance in arid-land streams in the northwestern United States. *Ecology of freshwater fish*, **10**, 1–10.
- FAO (2003) Fishery Records Collections. FIGIS Data Collection.

Fausch KD (2007) Introduction, establishment and effects of non-native salmonids: considering the risk of rainbow trout invasion in the United Kingdom. *Journal of Fish Biology*, **71**, 1–32.

Gall GA, Crandell PA (1992) The rainbow trout. *Aquaculture*, **100**, 1–10.

Isaak DJ, Luce CH, Horan DL, Chandler GL, Wollrab SP, Nagel DE (2018) Global warming of salmon and trout rivers in the Northwestern US: road to ruin or path through purgatory? *Transactions of the American Fisheries Society*, **147**, 566–587.

Jalabert B, Fostier A (2010) *La truite arc-en-ciel: De la biologie à l'élevage*. Editions Quae.

Kadye WT, Chakona A, Marufu LT, Samukange T (2013) The impact of non-native rainbow trout within Afro-montane streams in eastern Zimbabwe. *Hydrobiologia*, **720**, 75–88.

Keith P (2002) Freshwater fish and decapod crustacean populations on Réunion Island, with an assessment of species introductions. *Bulletin Français de la Pêche et de la Pisciculture*, 97–107.

King HR, Pankhurst NW, Watts M, Pankhurst PM (2003) Effect of elevated summer temperatures on gonadal steroid production, vitellogenesis and egg quality in female Atlantic salmon. *Journal of Fish Biology*, **63**, 153–167.

Koutsikos N, Vardakas L, Zogaris S, Perdikaris C, Kalantzi O-I, Economou AN (2019) Does rainbow trout justify its high rank among alien invasive species? Insights from a nationwide survey in Greece. *Aquatic Conservation: Marine and Freshwater Ecosystems*, **29**, 409–423.

Lecomte F, Beall E, Chat J, Davaine P, Gaudin P (2013) The complete history of salmonid introductions in the Kerguelen Islands, Southern Ocean. *Polar Biology*, **36**, 457–475. <https://doi.org/10.1007/s00300-012-1281-5>

MacCrimmon HR (1971) World Distribution of Rainbow Trout ( *Salmo gairdneri* ). *Journal of the Fisheries Research Board of Canada*, **28**, 663–704. <https://doi.org/10.1139/f71-098>

Matthews KR, Berg NH (1997) Rainbow trout responses to water temperature and dissolved oxygen stress in two southern California stream pools. *Journal of Fish Biology*, **50**, 50–67.

Morrison JK, Smith CE (1986) Altering the spawning cycle of rainbow trout by manipulating water temperature. *The Progressive Fish-Culturist*, **48**, 52–54.

Ngugi CC, Green JM (2007) Anthropogenic influences on population sizes, age and growth of naturalized rainbow trout, *Oncorhynchus mykiss*, in Kenya. *African Journal of Ecology*, **45**, 86–93.

395 Pankhurst NW, Purser GJ, Van Der Kraak G, Thomas PM, Forteach GNR (1996) Effect of holding temperature  
396 on ovulation, egg fertility, plasma levels of reproductive hormones and in vitro ovarian steroidogenesis  
397 in the rainbow trout *Oncorhynchus mykiss*. *Aquaculture*, **146**, 277–290.

398 Péfaur JE, Sierra NM (1998) Distribución y densidad de la trucha *Oncorhynchus mykiss* (Salmoniformes:  
399 Salmonidae) en los Andes venezolanos. *Revista de biología tropical*, **46**, 775–782.

400 R Development Core Team (2018) *R: A language and environment for statistical computing*. R Foundation for  
401 Statistical Computing, Vienna, Austria.

402 Raleigh RF (1984) *Habitat suitability information: rainbow trout*. Western Energy and Land Use Team,  
403 Division of Biological Services, Research ....

404 Robert R (1975) Note sur les essais d’aquaculture à la Réunion. *Madagascar : revue de géographie*, **26**, 101–  
405 102.

406 Robert R (1976) L’introduction de la truite arc-en-ciel à La Réunion. *Revue forestière française*, **5**, 386–387.

407 Robert R (1977) *Introduction et propagation de la truite arc-en-ciel à la réunion*.

408 Robert R (1978) La salmoniculture à l’île de la Réunion. *BOIS & FORETS DES TROPIQUES*, **177**, 65–70.

409 Robert R (1985) Géographie de l’eau à l’île de la Réunion : essai de distribution régionale de l’alimentation et de  
410 l’écoulement. These de doctorat Thesis. Montpellier.

411 Ruesch AS, Torgersen CE, Lawler JJ, Olden JD, Peterson EE, Volk CJ, Lawrence DJ (2012) Projected climate-  
412 induced habitat loss for salmonids in the John Day River network, Oregon, USA. *Conservation Biology*,  
413 **26**, 873–882.

414 Sauter ST, McMillan J, Dunham JB (2001) Salmonid behavior and water temperature. *Seattle, WA: United*  
415 *States, Environmental Protection Agency, Region 10 Office of Water. Final Report to the Policy*  
416 *workgroup of the EPA Region 10 Water Temperature Criteria Guidance Project. EPA 910-D-01-001.*  
417 *36 p.*

418 Scott WB, Crossman EJ (1973) *Freshwater fishes of Canada*. Ottawa.

419 Scott D, Poynter M (1991) Upper temperature limits for trout in New Zealand and climate change.  
420 *Hydrobiologia*, **222**, 147–151.

421 Sloat MR, Osterback A-MK (2013) Maximum stream temperature and the occurrence, abundance, and behavior  
422 of steelhead trout (*Oncorhynchus mykiss*) in a southern California stream. *Canadian Journal of*  
423 *Fisheries and Aquatic Sciences*, **70**, 64–73.

424 Stanković D, Crivelli AJ, Snoj A (2015) Rainbow Trout in Europe: Introduction, Naturalization, and Impacts.  
 425 *Reviews in Fisheries Science & Aquaculture*, **23**, 39–71.  
 426 <https://doi.org/10.1080/23308249.2015.1024825>

427 Sullivan K, Martin DJ, Cardwell RD, Toll JE, Duke S (2000) An analysis of the effects of temperature on  
 428 salmonids of the Pacific Northwest with implications for selecting temperature criteria. *Sustainable*  
 429 *Ecosystems Institute, Portland, OR*.

430 Therezien Y (1960) L'introduction de poissons d'eau douce à Madagascar, leur influence sur la modification du  
 431 biotope. *Bulletin français de pisciculture*, 45–61.

432 Vila I, Pardo R, Scott S (2007) Freshwater fishes of the Altiplano. *Aquatic Ecosystem Health & Management*,  
 433 **10**, 201–211.

434 Vimos DJ, Encalada AC, Ríos-Touma B, Suárez E, Prat N (2015) Effects of exotic trout on benthic communities  
 435 in high-Andean tropical streams. *Freshwater Science*, **34**, 770–783.

436 Welcomme RL (1988) *International Introductions of Inland Aquatic Species*. Food and Agriculture Organization  
 437 of the United Nations.  
 438



# TABLES

Table 1. Probability of rainbow trout establishing a self-sustaining population after introduction on Reunion Island as a function of the introduction history.

| Model                                       | np | AIC   | $\Delta$ AIC | Pseudo $R^2$ |
|---------------------------------------------|----|-------|--------------|--------------|
| P(trout) ~ 1                                | 1  | 38.55 | 0.00         | 0.000        |
| P(trout) ~ Number of introduction events    | 2  | 39.89 | 1.34         | 0.018        |
| P(trout) ~ Total number of trout introduced | 2  | 40.01 | 1.46         | 0.014        |
| P(trout) ~ Years since last introduction    | 2  | 40.46 | 1.91         | 0.003        |
| P(trout) ~ Origin of trout                  | 3  | 42.43 | 3.88         | 0.003        |

443 Table 2. Probability of the presence of a self-sustaining population of rainbow trout on Reunion Island as a function  
444 of mean monthly water temperature and season.

| Model                           | np | AIC    | $\Delta$ AIC | Pseudo- $R^2$ |
|---------------------------------|----|--------|--------------|---------------|
| P(trout) ~ 1                    | 1  | 621.06 | 137.26       | 0.000         |
| P(trout) ~ Temp                 | 2  | 574.03 | 90.23        | 0.076         |
| P(trout) ~ Temp + Season        | 3  | 495.03 | 11.23        | 0.203         |
| P(trout) ~ Temp $\times$ Season | 4  | 483.80 | 0.00         | 0.221         |

447 Table 3. Modeling mean monthly water temperature on Reunion Island as a function of elevation and season.

| Model                            | np | AIC    | $\Delta$ AIC | Pseudo-R <sup>2</sup> |
|----------------------------------|----|--------|--------------|-----------------------|
| Temp ~ 1                         | 1  | 5775.1 | 4426         | 0.000                 |
| Temp ~ Elevation                 | 2  | 2886.5 | 1537.4       | 0.500                 |
| Temp ~ Elevation + Season        | 3  | 1349.1 | 0.00         | 0.766                 |
| Temp ~ Elevation $\times$ Season | 4  | 1349.7 | 0.6          | 0.766                 |

## FIGURE CAPTIONS

Fig. 1. Current distribution of rainbow trout worldwide. a) Native-distribution (green), temperate (orange) and tropical (red) countries in which the species has been introduced (adapted from Crawford and Muir (2008). b) Results of introducing rainbow trout into tropical countries: evidence of the presence of self-sustaining populations in 1988 (in the review by Welcomme (1988), light blue) and after 1988 (dark blue), no information available about the presence of self-sustaining populations (light green), and no evidence of self-sustaining populations (dark green). See Table S1 for supporting information and references.

Fig. 2. Map of Reunion Island showing perennial rivers and the location and introduction effort at 33 sites where rainbow trout were introduced from 1940-2019. The number of introduction events, used as a proxy of the effort, is represented by increasing shades of gray. The star symbol represents an introduction site with unknown effort. See Table S2 for more information about the sites.

Fig. 3. Mean monthly water temperatures at 35 sites on perennial rivers on Reunion Island. Colors show the sites where attempts to introduce rainbow trout resulted in self-sustaining populations (green) or were not successful (red), and sites with no introduction events (gray). See Table S2 for details of the temperature data.

Fig. 4. Mean probability of the presence of rainbow trout on Reunion Island ( $\pm 1$  standard error) as a function of mean monthly water temperature and season (winter (blue) or summer (yellow)). The solid lines are estimates of the Mtemp model (Table 2), and circles are raw data. The dashed lines represent 0.95, 0.50 and 0.05 probabilities of the presence of trout, from top to bottom.

Fig. 5. Winter and summer water temperatures at 35 sites on Reunion Island. Colors show the sites where attempts to introduce rainbow trout resulted in self-sustaining populations (green) or were not successful (red), and sites with no introduction events (gray). The dashed lines represent estimated thresholds of water temperatures for 0.95, 0.50 and 0.05 probabilities of the presence of trout, from top to bottom. Sites are ordered by increasing elevation. Whiskers represent 1.5 times the interquartile range. See Table S2 for more information about the sites.

Fig. 6. Relationship between mean monthly water temperature and elevation in winter (blue) and summer (yellow) on Reunion Island. The solid lines are model estimates (Table 3), and the gray circles are raw data.

481 Fig. 7. Map illustrating the predicted probability of the presence of self-sustaining populations of rainbow trout  
 482 after introduction into all perennial rivers on Reunion Island. Circles show the location of 33 sites where rainbow  
 483 trout were introduced and are absent (circled black point) or present (circled black cross).

a) 484 FIGURES

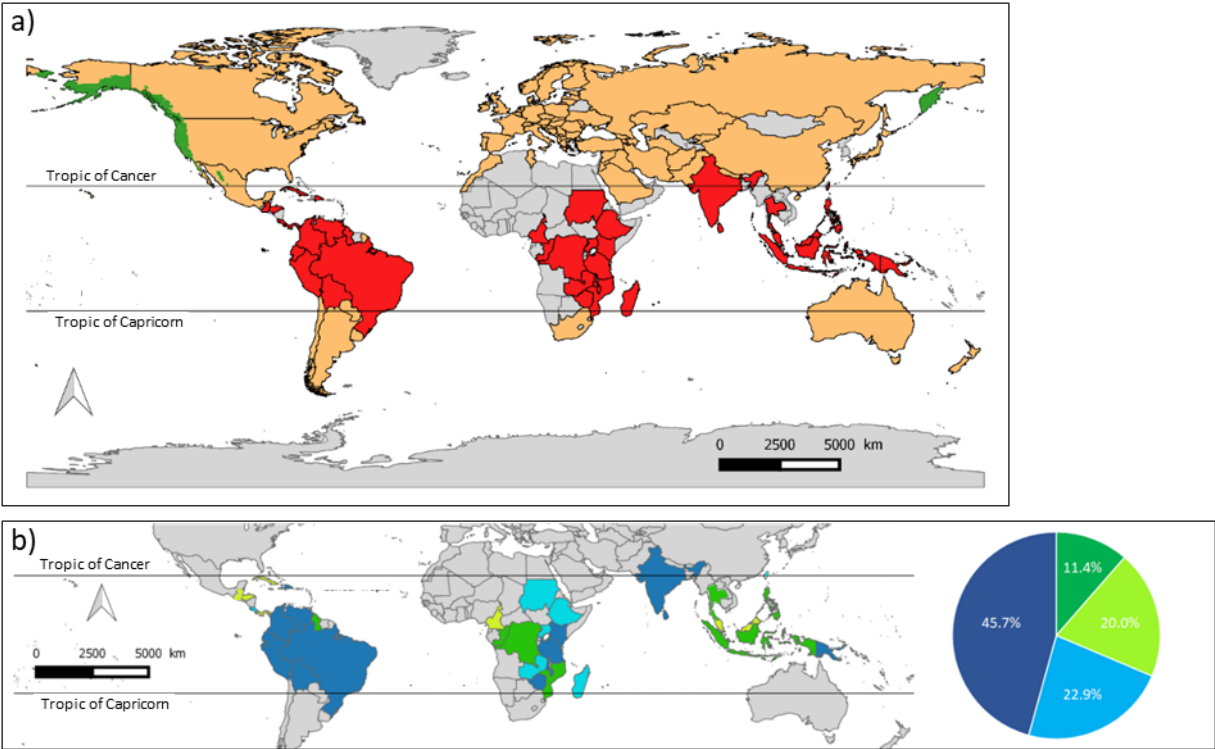

485  
486 Figure 1  
487

b)

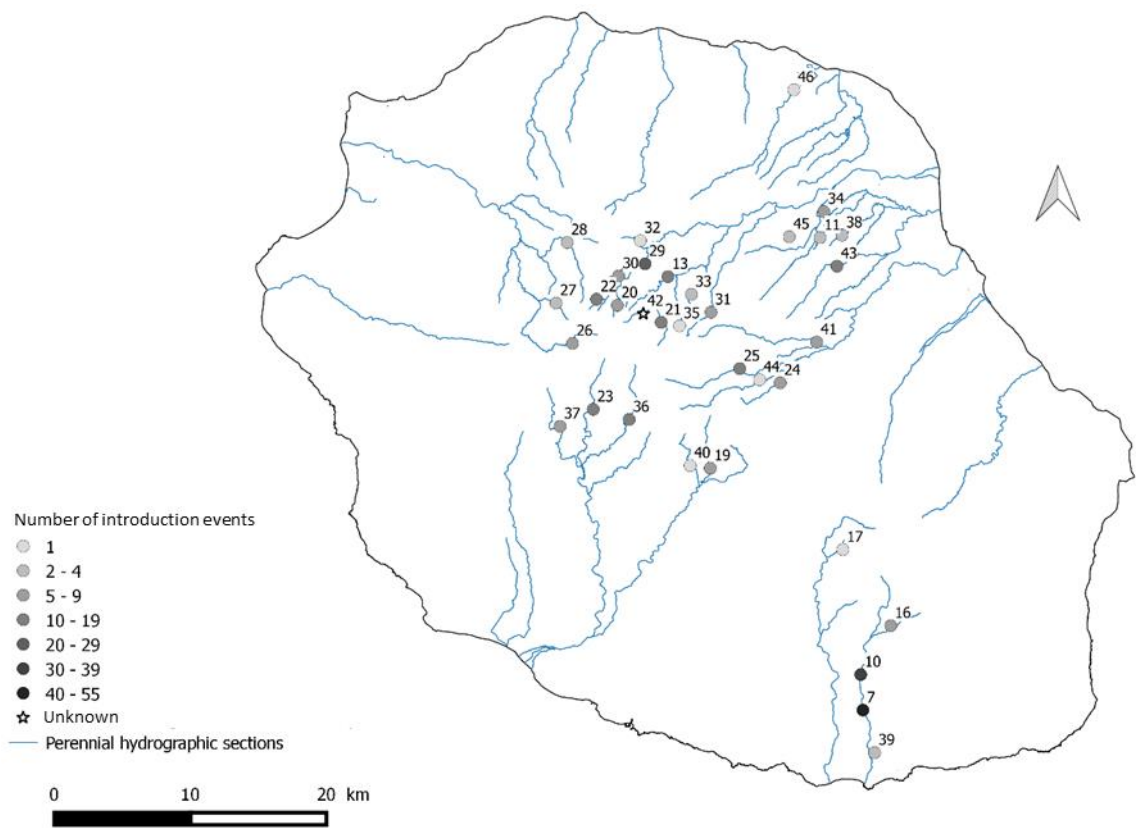

Figure 2

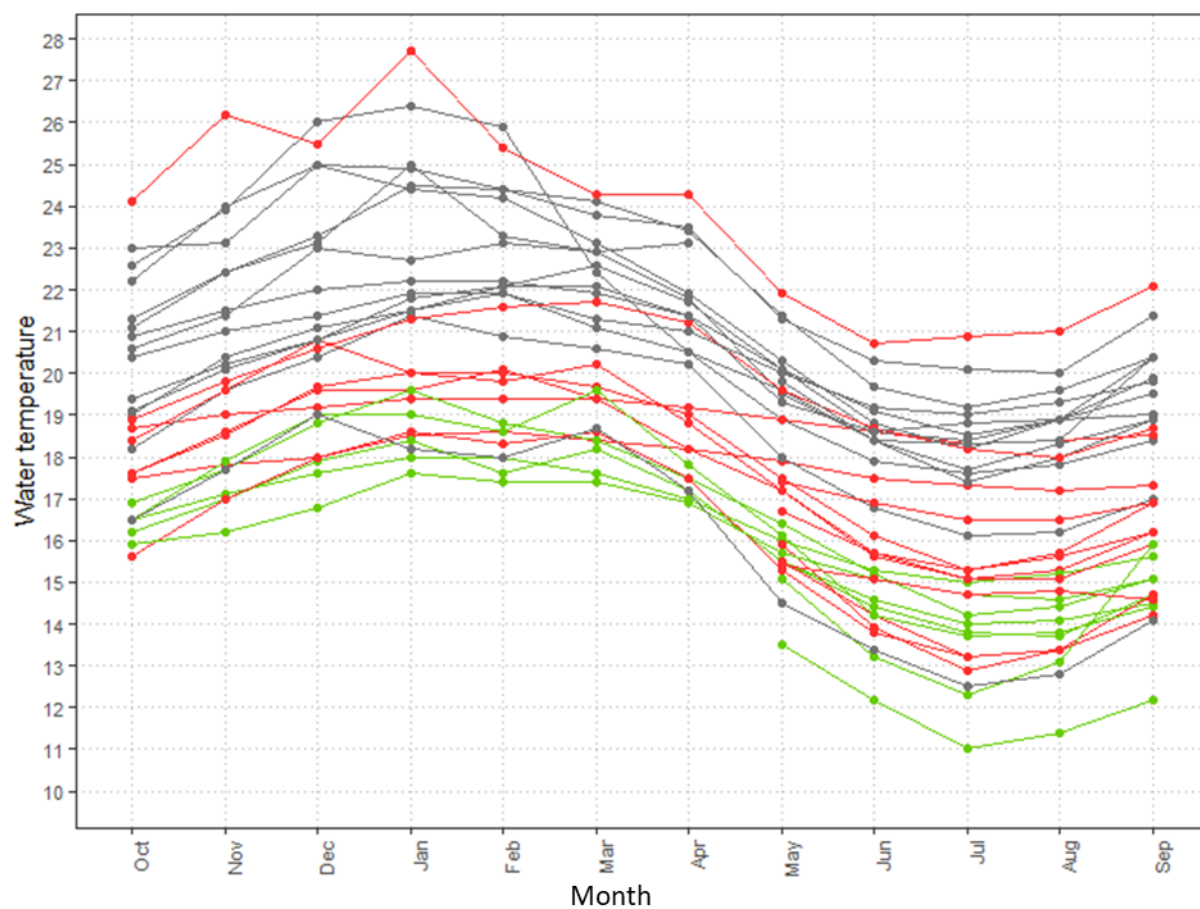

Figure 3



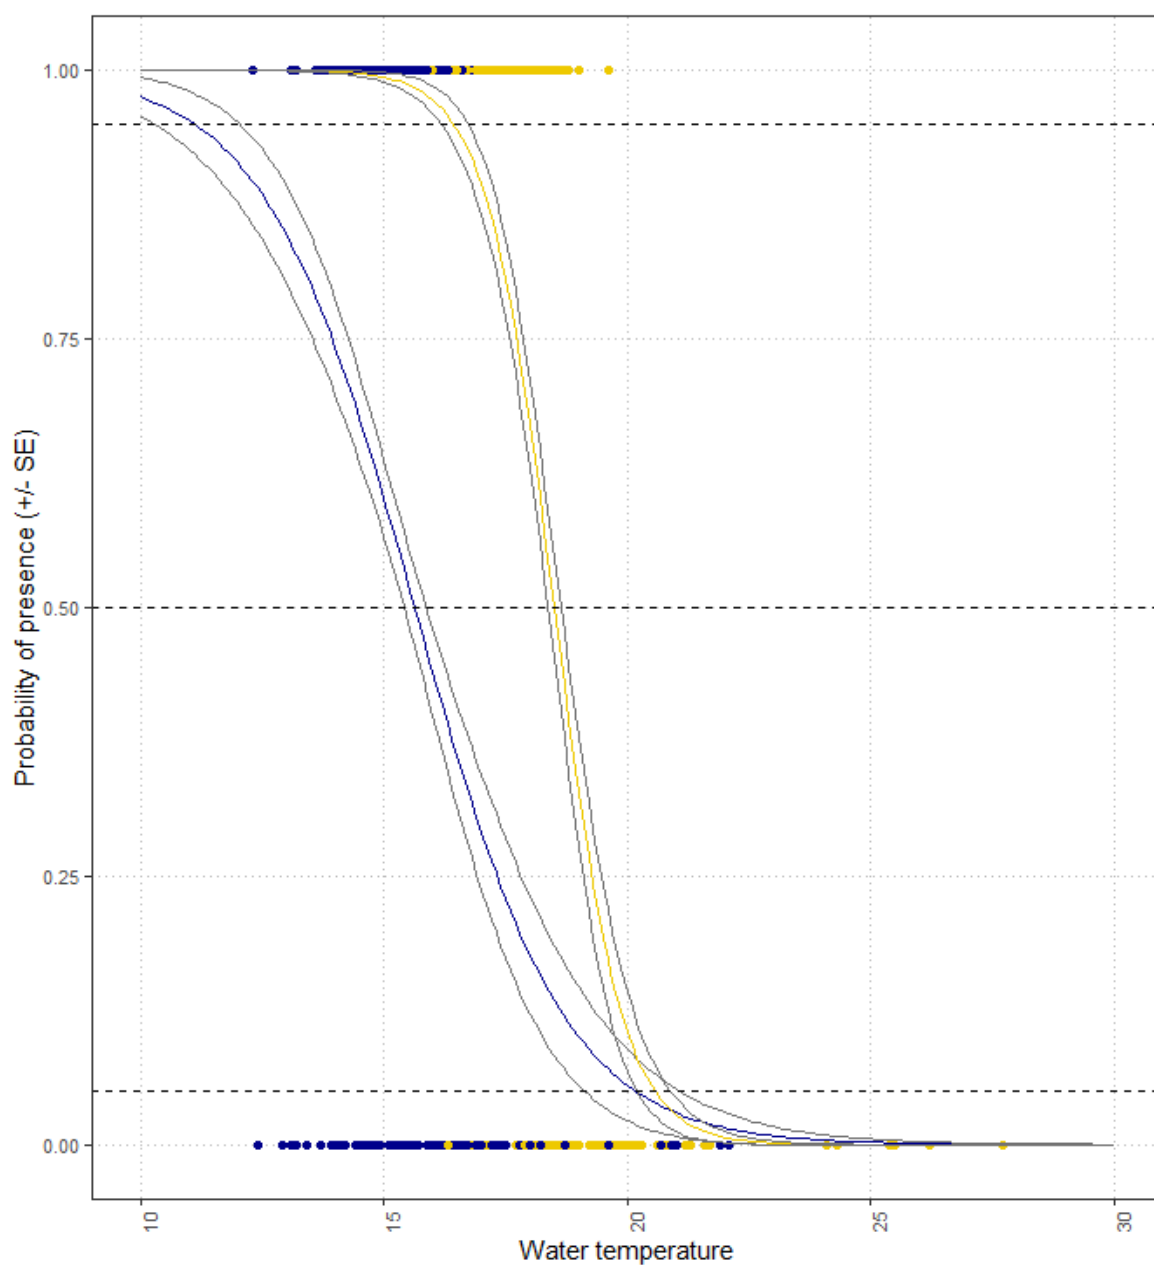

Figure 4

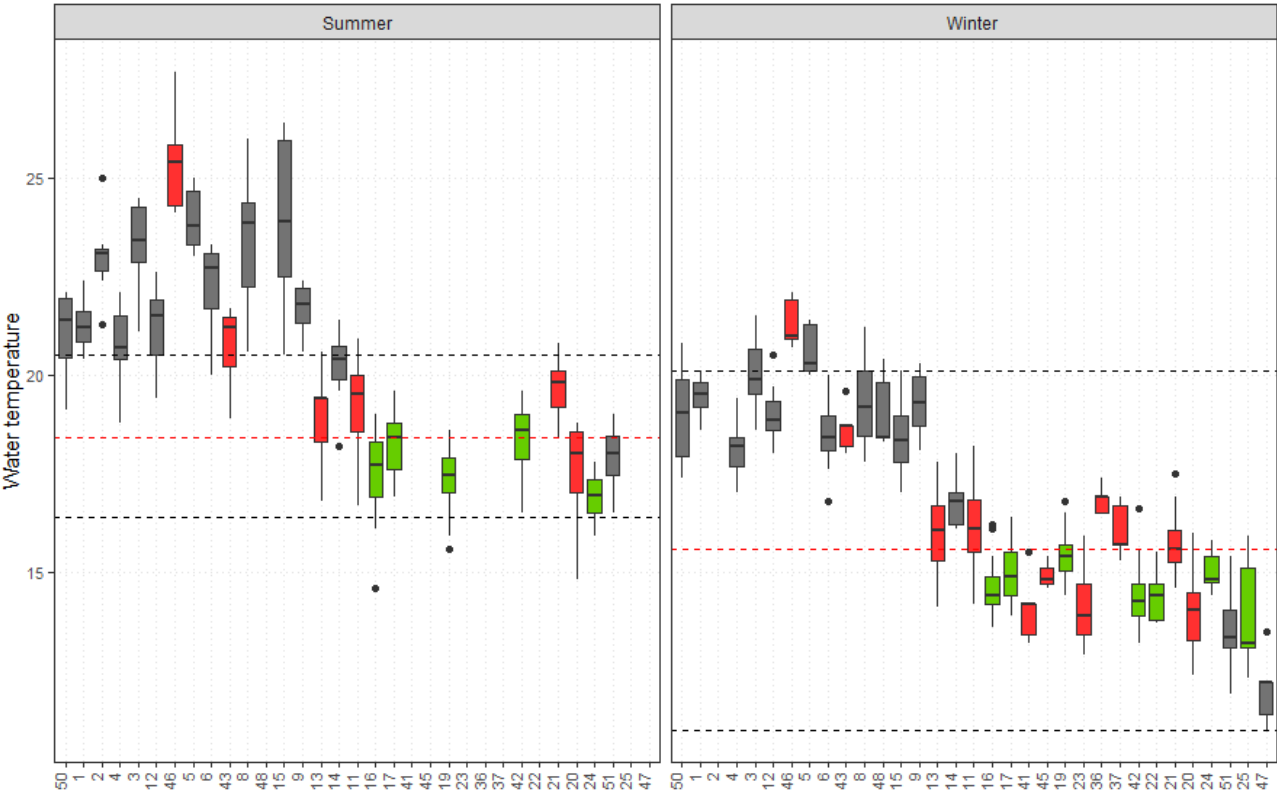

Figure 5.

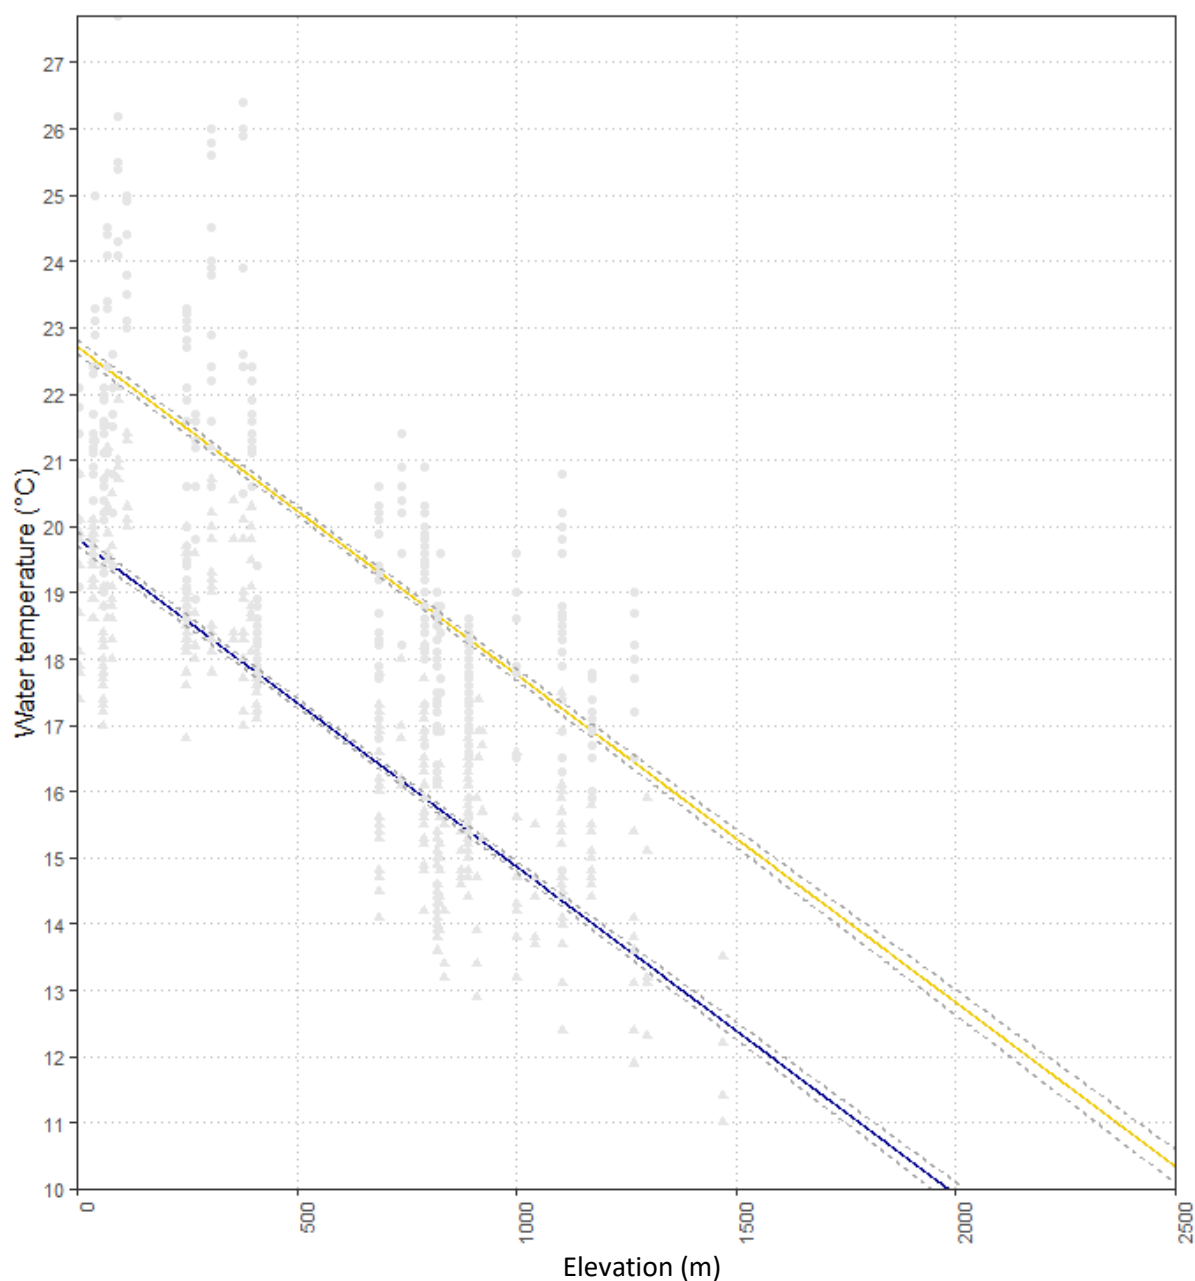

Figure 6

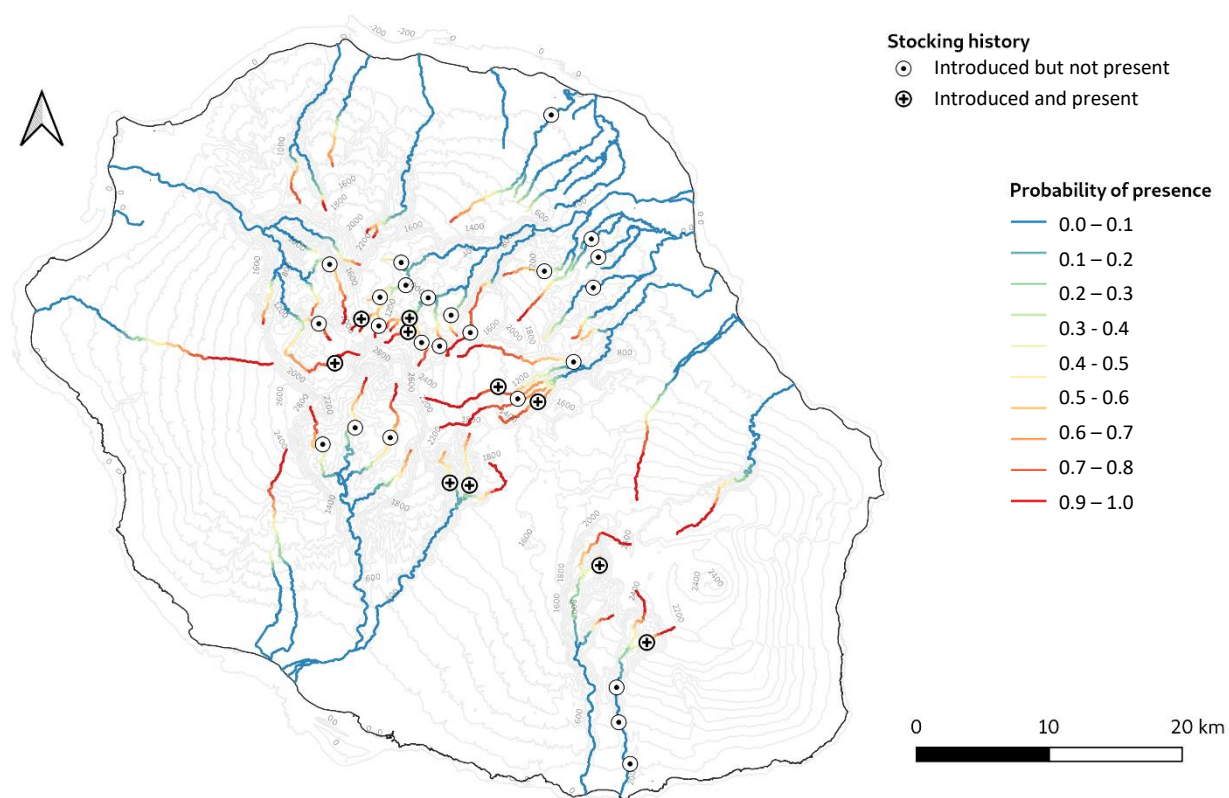

Figure 7
